# Supplementary material for: Identification of Diagnostic and Prognostic microRNAs for Recurrent Vitreous Hemorrhage in Patients with Proliferative Diabetic Retinopathy
Source: J Clin Med. 2019 Dec 15;8(12):2217. doi: 10.3390/jcm8122217 (PMC6947310; doi:10.3390/jcm8122217)
Supplement: Supplementary file 1 [file jcm-08-02217-s001.xlsx]

## Sheet: All
Supplementary Table 1 – Relative regulation of angiogenic miRNA between PDR, and to control vitreous, over a 4-fold cut-off.
Non-RVH	Fold Regulation / Comment							pre-RVH	Fold Regulation / Comment							post-RVH	Fold Regulation / Comment
ID	vs CTRL		vs pre-RVH		vs post-RVH			ID	vs CTRL		vs non-RVH		vs post-RVH			ID	vs CTRL		vs non-RVH		vs pre-RVH
let-7b					-4.0139	A		let-7g	7.8899	C	11.5115	C				let-7b			4.0139	A
let-7d	-9.2211	B			-5.4076	B		let-7i			9.8833	B				let-7d			5.4076	B
let-7e	-4.6426	C						miRNA-15b			4.8736	B				let-7f	-5.0982	C
let-7g			-11.5115	C	-8.604	C		miRNA-16			6.3423	A				let-7g	5.8971	C	8.604	C
let-7i	-7.754	B						miRNA-19a			9.4807	B				let-7i			12.9511	B
let-7i			-9.8833	B	-12.9511	B		miRNA-19b			5.7557	B				miRNA-7			4.4847	C
miRNA-7					-4.4847	C		miRNA-20a			13.1319	B				miRNA-9	-4.6268	C
miRNA-9	-5.5594	C						miRNA-22	10.1261	B	13.5011	B				miRNA-15b			7.4902	B
miRNA-15b	-4.6749	B	-4.8736	B	-7.4902	B		miRNA-24			6.3423	B				miRNA-16			8.4855	A
miRNA-16			-6.3423	A	-8.4855	A		miRNA-26a			4.0418	C				miRNA-17			8.7241	C
miRNA-17	-4.0416	C			-8.7241	C		miRNA-27a			16.0555	B				miRNA-18a			6.3864	C
miRNA-18a	-8.8454	C			-6.3864	C		miRNA-29a			10.3031	B				miRNA-19a			9.6131	B
miRNA-19a	-7.4898	C	-9.4807	B	-9.6131	B		miRNA-29b	4.5315	C	6.6116	C				miRNA-19b			4.2428	C
miRNA-19b	-4.2721	C	-5.7557	B	-4.2428	C		miRNA-29c			8.8458	B				miRNA-20a	4	B	20.7494	B
miRNA-20a	-5.1871	C	-13.1319	B	-20.7494	B		miRNA-30c			5.8361	C				miRNA-22	8.6338	C	11.5115	C
miRNA-22			-13.5011	B	-11.5115	C		miRNA-32	-4.8568	C						miRNA-25			4.0699	A
miRNA-23b	-5.9584	C						miRNA-92a			5.0107	A				miRNA-26a			5.7958	C
miRNA-24	-4.8063	C	-6.3423	B	-4.0699	A		miRNA-93			13.2232	C				miRNA-27a			8.4855	C
miRNA-26a	-5.8358	C	-4.0418	C	-5.7958	C		miRNA-103a			4.362	C				miRNA-29a	-4.0278	C
miRNA-27a	-5.4829	C	-16.0555	B	-8.4855	C		miRNA-106b	4.8232	C	7.0372	C				miRNA-29c			5.8767	C
miRNA-29a	-14.57	C	-10.3031	B				miRNA-126			12.5969	B				miRNA-32	-6.774	C
miRNA-29b			-6.6116	C				miRNA-128					-12.1257	C		miRNA-92a			8.0836	A
miRNA-29c	-10.4464	C	-8.8458	B	-5.8767	C		miRNA-130a			13.1319	C				miRNA-93			30.3789	C
miRNA-30c			-5.8361	C				miRNA-142	-4.9588	A	-5.1159	A				miRNA-100	-4.4383	C
miRNA-32	-8.1395	C						miRNA-150			29.3441	B				miRNA-103a			6.6116	C
miRNA-92a	-4.098	A	-5.0107	A	-8.0836	A		miRNA-185			4.9075	C				miRNA-106b	7.8899	C	11.5115	C
miRNA-93	-20.8928	C	-13.2232	C	-30.3789	C		miRNA-191			6.3864	B				miRNA-125b			4.2723	B
miRNA-101	-4.3618	C						miRNA-195			6.7039	A				miRNA-126			12.4235	C
miRNA-103a	-9.1574	C	-4.362	C	-6.6116	C		miRNA-200c	-4.6913	C						miRNA-128	4.4076	C	7.1851	C	12.1257	C
miRNA-106b			-7.0372	C	-11.5115	C		miRNA-374a	-9.3179	C						miRNA-130a			14.5707	C
miRNA-125b					-4.2723	B										miRNA-150			30.5903	C
miRNA-126	-8.4851	C	-12.5969	B	-12.4235	C										miRNA-151a			4.84	C
miRNA-128					-7.1851	C										miRNA-185	4.5948	C	6.7039	C
miRNA-130a	-6.2547	C	-13.1319	C	-14.5707	C										miRNA-191			6.7039	C
miRNA-142			5.1159	A												miRNA-195			5.5213	A
miRNA-150	-21.1844	C	-29.3441	B	-30.5903	C										miRNA-222			4.8065	C
miRNA-151a					-4.84	C										miRNA-374a	-4.4691	C
miRNA-185			-4.9075	C	-6.7039	C
miRNA-191	-7.1847	C	-6.3864	B	-6.7039	C
miRNA-195	-4.4227	A	-6.7039	A	-5.5213	A
miRNA-222					-4.8065	C
miRNA-374a	-5.37	C
Comment
A: Relative Ct < 30; Interpolated P < 0.05
B: Relative Ct ≤ 30; Interpolated P ≤ 0.05
C: Relative Ct > 30; Interpolated P ≤ 0.05

## Sheet: NonRebleed
let-7b					-4.0139	A		-1
let-7d	-9.2211	B			-5.4076	B
let-7e	-4.6426	C
let-7g			-11.5115	C	-8.604	C
let-7i	-7.754	B
let-7i			-9.8833	B	-12.9511	B
miRNA-7					-4.4847	C
miRNA-9	-5.5594	C
miRNA-15b	-4.6749	B	-4.8736	B	-7.4902	B
miRNA-16			-6.3423	A	-8.4855	A
miRNA-17	-4.0416	C			-8.7241	C
miRNA-18a	-8.8454	C			-6.3864	C
miRNA-19a	-7.4898	C	-9.4807	B	-9.6131	B
miRNA-19b	-4.2721	C	-5.7557	B	-4.2428	C
miRNA-20a	-5.1871	C
miRNA-20a			-13.1319	B	-20.7494	B
miRNA-22			-13.5011	B	-11.5115	C
miRNA-23b	-5.9584	C
miRNA-24	-4.8063	C	-6.3423	B	-4.0699	A
miRNA-26a	-5.8358	C	-4.0418	C	-5.7958	C
miRNA-27a	-5.4829	C	-16.0555	B	-8.4855	C
miRNA-29a	-14.57	C	-10.3031	B
miRNA-29b			-6.6116	C
miRNA-29c	-10.4464	C	-8.8458	B	-5.8767	C
miRNA-30c			-5.8361	C
miRNA-32	-8.1395	C
miRNA-92a	-4.098	A	-5.0107	A	-8.0836	A
miRNA-93	-20.8928	C	-13.2232	C	-30.3789	C
miRNA-101	-4.3618	C
miRNA-103a	-9.1574	C	-4.362	C	-6.6116	C
miRNA-106b			-7.0372	C	-11.5115	C
miRNA-125b					-4.2723	B
miRNA-126	-8.4851	C	-12.5969	B	-12.4235	C
miRNA-128					-7.1851	C
miRNA-130a	-6.2547	C	-13.1319	C	-14.5707	C
miRNA-142			5.1159	A
miRNA-150	-21.1844	C	-29.3441	B	-30.5903	C
miRNA-151a					-4.84	C
miRNA-185			-4.9075	C	-6.7039	C
miRNA-191	-7.1847	C	-6.3864	B	-6.7039	C
miRNA-195	-4.4227	A	-6.7039	A	-5.5213	A
miRNA-222					-4.8065	C
miRNA-374a	-5.37	C
ID	vs Control		vs Bleed		vs Rebleed

## Sheet: Bleed
let-7f					2.6027	C
let-7g	7.8899	C	11.5115	C
let-7i			9.8833	B
miRNA-15b			4.8736	B
miRNA-16			6.3423	A
miRNA-17					-2.4623	C
miRNA-19a			9.4807	B
miRNA-19b			5.7557	B
miRNA-20a			13.1319	B
miRNA-21					3.5064	A
miRNA-22	10.1261	B	13.5011	B
miRNA-23a					3.2944	A
miRNA-24			6.3423	B
miRNA-26a			4.0418	C
miRNA-27a			16.0555	B
miRNA-29a			10.3031	B	2.8481	B
miRNA-29b	4.5315	C	6.6116	C	2.0849	C
miRNA-29c			8.8458	B
miRNA-30c			5.8361	C	2.7702	C
miRNA-32	-4.8568	C
miRNA-92a			5.0107	A
miRNA-93			13.2232	C	-2.2974	C
miRNA-100					2.8679	B
miRNA-103a			4.362	C
miRNA-106b	4.8232	C	7.0372	C
miRNA-122					-2.0994	C
miRNA-126			12.5969	B
miRNA-128					-12.1257	C
miRNA-130a			13.1319	C
miRNA-142	-4.9588	A	-5.1159	A	-3.6808	A
miRNA-146a					2.3134	B
miRNA-150			29.3441	B
miRNA-151a					-3.5801	C
miRNA-185			4.9075	C
miRNA-191			6.3864	B
miRNA-194					-2.2346	C
miRNA-195			6.7039	A
miRNA-200c	-4.6913	C
miRNA-222					-2.3784	C
miRNA-374a	-9.3179	C
miRNA-376c					-2.3457	C
ID	vs Control		vs NonRebleed		vs Rebleed

## Sheet: Rebleed
let-7b			4.0139	A
let-7d			5.4076	B
let-7f	-5.0982	C			-2.6027	C
let-7g	5.8971	C	8.604	C
let-7i			12.9511	B
miRNA-7			4.4847	C
miRNA-9	-4.6268	C
miRNA-15b			7.4902	B
miRNA-16			8.4855	A
miRNA-17			8.7241	C	2.4623	C
miRNA-18a			6.3864	C
miRNA-19a			9.6131	B
miRNA-19b			4.2428	C
miRNA-20a	4	B	20.7494	B
miRNA-21					-3.5064	A
miRNA-22	8.6338	C	11.5115	C
miRNA-23a					-3.2944	A
miRNA-25			4.0699	A
miRNA-26a			5.7958	C
miRNA-27a			8.4855	C
miRNA-29a	-4.0278	C			-2.8481	B
miRNA-29b					-2.0849	C
miRNA-29c			5.8767	C
miRNA-30c					-2.7702	C
miRNA-32	-6.774	C
miRNA-92a			8.0836	A
miRNA-93			30.3789	C	2.2974	C
miRNA-100	-4.4383	C			-2.8679	B
miRNA-103a			6.6116	C
miRNA-106b	7.8899	C	11.5115	C
miRNA-122					2.0994	C
miRNA-125b			4.2723	B
miRNA-126			12.4235	C
miRNA-128	4.4076	C	7.1851	C	12.1257	C
miRNA-130a			14.5707	C
miRNA-142					3.6808	A
miRNA-146a					-2.3134	B
miRNA-150			30.5903	C
miRNA-151a			4.84	C	3.5801	C
miRNA-185	4.5948	C	6.7039	C
miRNA-191			6.7039	C
miRNA-194					2.2346	C
miRNA-195			5.5213	A
miRNA-222			4.8065	C	2.3784	C
miRNA-374a	-4.4691	C
miRNA-376c					2.3457	C
ID	vs Control		vs NonRebleed		vs Bleed
